# Supplementary material for: Primary bile acid activates Egr-1 expression through the MAPK signaling pathway in gastric cancer
Source: PubMed Central journal article supplement — Mol Med Rep. 2022 Feb 15;25(4):129. doi: 10.3892/mmr.2022.12646 (PMC8867467; doi:10.3892/mmr.2022.12646), 2022-02-15

Figure S1. Conjugated and unconjugated primary bile acid. The TCA level (median 1.71  $\mu\text{g/ml}$ ) was higher compared with that of CA (median 0.02  $\mu\text{g/ml}$ ;  $P < 0.001$ ), and the GCDCA level (median 2.36  $\mu\text{g/ml}$ ) was higher compared with that of CDCA (median 0.00  $\mu\text{g/ml}$ ;  $P < 0.001$ ). CA, cholic acid; TCA, taurocholic acid; CDCA, chenodeoxycholic acid; GCDCA, glycochenodeoxycholic acid.

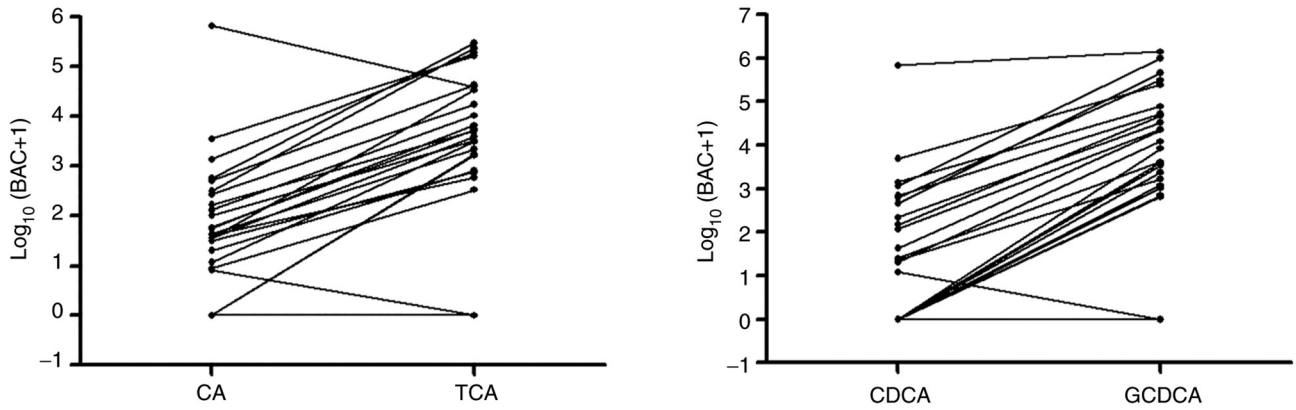

Supplement: Supplementary_Data1.pdf [file Supplementary_Data1.pdf]
