# Supplementary material for: Primary bile acid activates Egr-1 expression through the MAPK signaling pathway in gastric cancer
Source: PubMed Central journal article supplement — Mol Med Rep. 2022 Feb 15;25(4):129. doi: 10.3892/mmr.2022.12646 (PMC8867467; doi:10.3892/mmr.2022.12646), 2022-02-15
Supplement: Supplementary_Data2.pdf [file Supplementary_Data2.pdf]

Table SI. Bile acid information.

| Compound                   | Company       | Cat. No. | Solvent | Molecular weight, g/mol | Stock concentration, mM | Working concentration, $\mu$ M |
|----------------------------|---------------|----------|---------|-------------------------|-------------------------|--------------------------------|
| Cholic acid                | Sigma-Aldrich | C9377    | DMSO    | 408.57                  | 100                     | 100                            |
| Chenodeoxycholic acid      | Sigma-Aldrich | C1192    | DMSO    | 392.57                  | 25.5                    | 100                            |
| Taurocholic acid           | Sigma-Aldrich | T4009    | Ethanol | 515.70                  | 18.6                    | 100                            |
| Glycochenodeoxycholic acid | Sigma-Aldrich | G0759    | Ethanol | 449.62                  | 5.3                     | 100                            |

Table SII. Baseline characteristics

| Parameter                                                         | Controls (n=20) | Patients with early gastric cancer (n=19) | P-value |
|-------------------------------------------------------------------|-----------------|-------------------------------------------|---------|
| Age, mean±SD                                                      | 50.0±12.6       | 63.0±13.2                                 | <0.001  |
| Male, n (%)                                                       | 13 (65.0)       | 13 (68.4)                                 | 1.000   |
| Hypertension, n (%)                                               | 2 (10.0)        | 6 (31.6)                                  | 0.127   |
| Diabetes, n (%)                                                   | 2 (10.0)        | 4 (21.1)                                  | 0.407   |
| Cholecystectomy, n (%)                                            | 0 (0.0)         | 1 (5.3)                                   | 0.487   |
| Infection of <i>H. pylori</i>                                     | 7 (35.0)        | 10 (52.6)                                 |         |
| <sup>a</sup> Atrophic gastritis with intestinal metaplasia, n (%) | 8 (40.0)        | 15 (78.9)                                 | 0.022   |

<sup>a</sup>Background histological manifestation. SD, standard deviation; *H. pylori*, *Helicobacter pylori*
